# Supplementary material
Source: MDPI journal article supplement (https://www.mdpi.com/1873-149X/30/2/9)
Supplement: s1 [file s1]

**Table S1.** Associations of NF- $\kappa$ B, COX-2, Sp1, and c-Jun tissue expressions with other clinicopathological characteristics in PDAC patients

| Factors                 | Total | NF-κB (RelA) |                    | NF-κB (RelA) |                    | COX-2        |                    | Sp1          |                    | c-Jun        |                    |
|-------------------------|-------|--------------|--------------------|--------------|--------------------|--------------|--------------------|--------------|--------------------|--------------|--------------------|
|                         |       | Cytoplasmic  | P-value            | Nuclear      | P-value            | Positive (%) | P-value            | Positive (%) | P-value            | Positive (%) | P-value            |
|                         |       | Positive (%) |                    | Positive (%) |                    | Positive (%) |                    | Positive (%) |                    |              |                    |
| Gender                  |       |              |                    |              |                    |              |                    |              |                    |              |                    |
| Male                    | 19    | 7 (36.8)     | 0.563              | 5 (26.3)     | 0.475 <sup>+</sup> | 17 (89.5)    | 0.370 <sup>+</sup> | 9 (47.4)     | 0.260              | 6 (31.6)     | 0.097              |
| Female                  | 15    | 7 (46.7)     |                    | 6 (40.0)     |                    | 11 (73.3)    |                    | 10 (66.7)    |                    | 9 (60.0)     |                    |
| Age (years old)         |       |              |                    |              |                    |              |                    |              |                    |              |                    |
| ≥60                     | 11    | 5 (45.5)     | 1.000 <sup>+</sup> | 4 (36.4)     | 1.000 <sup>+</sup> | 9 (81.8)     | 1.000 <sup>+</sup> | 4 (36.4)     | 0.151 <sup>+</sup> | 5 (45.5)     | 1.000 <sup>+</sup> |
| <60                     | 23    | 9 (39.1)     |                    | 7 (30.4)     |                    | 19 (82.6)    |                    | 15 (65.2)    |                    | 10 (43.5)    |                    |
| Grade                   |       |              |                    |              |                    |              |                    |              |                    |              |                    |
| >1                      | 20    | 8 (40.0)     | 0.868              | 6 (30.0)     | 1.000 <sup>+</sup> | 17 (85.0)    | 0.672 <sup>+</sup> | 11 (55.0)    | 0.901              | 10 (50.0)    | 0.409              |
| 1                       | 14    | 6 (42.9)     |                    | 5 (35.7)     |                    | 11 (78.6)    |                    | 8 (57.1)     |                    | 5 (35.7)     |                    |
| Perineural Invasion     |       |              |                    |              |                    |              |                    |              |                    |              |                    |
| Present                 | 11    | 3 (27.3)     | 0.295 <sup>+</sup> | 3 (27.3)     | 1.000 <sup>+</sup> | 9 (81.8)     | 1.000 <sup>+</sup> | 7 (63.6)     | 0.715 <sup>+</sup> | 5 (45.5)     | 1.000 <sup>+</sup> |
| Not Present             | 23    | 11 (47.8)    |                    | 8 (34.8)     |                    | 19 (82.6)    |                    | 12 (52.2)    |                    | 10 (43.5)    |                    |
| Lymphovascular Invasion |       |              |                    |              |                    |              |                    |              |                    |              |                    |
| Present                 | 6     | 4 (66.7)     | 0.202 <sup>+</sup> | 4 (66.7)     | 0.070 <sup>+</sup> | 6 (100.0)    | 0.562 <sup>+</sup> | 5 (83.3)     | 0.196 <sup>+</sup> | 4 (66.7)     | 0.370 <sup>+</sup> |
| Not Present             | 28    | 10 (35.7)    |                    | 7 (25.0)     |                    | 22 (78.6)    |                    | 14 (50.0)    |                    | 11 (39.3)    |                    |
| Type of Specimens       |       |              |                    |              |                    |              |                    |              |                    |              |                    |
| Biopsy                  | 13    | 7 (53.8)     | 0.238              | 4 (30.8)     | 1.000 <sup>+</sup> | 11 (84.6)    | 1.000 <sup>+</sup> | 4 (30.8)     | 0.020              | 2 (15.4)     | 0.008              |
| Resection               | 21    | 7 (33.3)     |                    | 7 (33.3)     |                    | 17 (81.0)    |                    | 15 (71.4)    |                    | 13 (61.9)    |                    |
| Cancer Stage            |       |              |                    |              |                    |              |                    |              |                    |              |                    |
| III-IV                  | 24    | 10 (41.7)    | 1.000 <sup>+</sup> | 7 (29.2)     | 0.692 <sup>+</sup> | 21 (87.5)    | 0.328 <sup>+</sup> | 13 (54.2)    | 1.000 <sup>+</sup> | 10 (41.7)    | 0.718 <sup>+</sup> |
| I-II                    | 10    | 4 (40.0)     |                    | 4 (40.0)     |                    | 7 (70.0)     |                    | 6 (60.0)     |                    | 5 (50.0)     |                    |
| Metastasis (stage IV)   |       |              |                    |              |                    |              |                    |              |                    |              |                    |
| Present                 | 14    | 6 (42.9)     | 0.868              | 4 (28.6)     | 1.000 <sup>+</sup> | 12 (85.7)    | 1.000 <sup>+</sup> | 7 (50.0)     | 0.563              | 7 (50.0)     | 0.563              |
| Not Present             | 20    | 8 (40.0)     |                    | 7 (35.0)     |                    | 16 (80.0)    |                    | 12 (60.0)    |                    | 8 (40.0)     |                    |
